# Supplementary material for: Stress perception, coping behaviors and work-privacy conflict of student midwives in times of COVID-19 pandemic: the “Healthy MidStudents” study in Germany
Source: Springer Nature journal article supplement (doi:10.1186/s12913-024-10823-5), 2024-05-07
Supplement: MOESM2 [file 27065434]

**Additional file 2.** List of main variables and measurement.

| <b>Construct (type of variable)</b>                      | <b>Measurement</b>                                                                                                                                                                                                                                                                                                                   | <b>Number of items</b> |
|----------------------------------------------------------|--------------------------------------------------------------------------------------------------------------------------------------------------------------------------------------------------------------------------------------------------------------------------------------------------------------------------------------|------------------------|
| Sociodemographic data                                    | Self-developed items on age, parental status, number of children, highest level of education, migration background. Item on gender from Copenhagen Psychosocial Questionnaire (COPSOQ III) (Lincke et al., 2021) and item on marital status from Mikrozensus 2023 questionnaire (Statistische Ämter des Bundes und der Länder, 2023) | 7                      |
| Study-related data                                       | Self-developed items on study location, training level, study program                                                                                                                                                                                                                                                                | 3                      |
| General health                                           |                                                                                                                                                                                                                                                                                                                                      |                        |
| Health status                                            | Copenhagen Psychosocial Questionnaire (COPSOQ III) (Lincke et al., 2021)                                                                                                                                                                                                                                                             | 1                      |
| Body-Mass-Index                                          | Body weight and height (BMI)                                                                                                                                                                                                                                                                                                         | 2                      |
| Health behaviors                                         |                                                                                                                                                                                                                                                                                                                                      |                        |
| Dietary pattern                                          | Mediterranean Diet Score (MDS), Western Diet Score (WDS) (Stewart et al., 2016)                                                                                                                                                                                                                                                      | 10                     |
| Physical activity                                        | International Physical Activity Questionnaire – short form (IPAQ) (Craig et al., 2003)                                                                                                                                                                                                                                               | 7                      |
| Sleep quality                                            | Pittsburgh Sleep Quality Index (PSQI-D) (Hinz et al., 2017)                                                                                                                                                                                                                                                                          | 1                      |
| Smoking                                                  | Self-developed items on smoking status                                                                                                                                                                                                                                                                                               | 2                      |
|                                                          | Fagerström Test for Nicotine Dependence (FTND) (Heatheron et al., 1991)                                                                                                                                                                                                                                                              | 6                      |
| Alcohol consumption                                      | Alcohol Use Disorders Identification Test - Consumption (AUDIT-C) (Ganz et al., 2017)                                                                                                                                                                                                                                                | 3                      |
| Comparison between practical and theoretical study stage | Self-developed items                                                                                                                                                                                                                                                                                                                 | 3                      |
| Occupational Health literacy                             | Occupational Health Literacy Scale (OHLS) (Friedrich et al., 2023)                                                                                                                                                                                                                                                                   | 12                     |
| Stress perception                                        | Perceived Stress Scale (PSS-10) (Klein et al., 2016)                                                                                                                                                                                                                                                                                 | 10                     |
|                                                          | Self-developed item on comparison between practical and theoretical study stage                                                                                                                                                                                                                                                      | 1                      |
| Work-privacy conflict                                    | Copenhagen Psychosocial Questionnaire (COPSOQ III) (Lincke et al., 2021)                                                                                                                                                                                                                                                             | 4                      |
| Coping behaviors                                         | Stress- and Coping Inventory (SCI) (Satow, 2012)                                                                                                                                                                                                                                                                                     | 20                     |

|                                                  |                                                                                                                                                                                                                              |    |
|--------------------------------------------------|------------------------------------------------------------------------------------------------------------------------------------------------------------------------------------------------------------------------------|----|
| Preparation for profession                       | Self-developed items on health counselling competences, preparation for midwifery profession and interprofessional collaboration, preferred job activities                                                                   | 4  |
| Perceived impact of COVID-19 pandemic on studies | Self-developed items on perceived impact of COVID-19 pandemic on studies                                                                                                                                                     | 3  |
| Workplace health promotion                       | Self-developed items on knowledge, use and evaluation of workplace health promotion offers in academic institutions and in the workplace, reasons for non-participation, needs for further workplace health promotion offers | 25 |

---
