# Supplementary material for: Stress perception, coping behaviors and work-privacy conflict of student midwives in times of COVID-19 pandemic: the “Healthy MidStudents” study in Germany
Source: Springer Nature journal article supplement (doi:10.1186/s12913-024-10823-5), 2024-05-07
Supplement: MOESM3 [file 27065434]

**Additional file 3.** Linear regression analysis of associations between work-privacy conflict and coping behaviors.

| Variable                   | Positive thinking       |        |         |                 | Active stress coping   |      |         |                 | Social support          |        |         |                 |
|----------------------------|-------------------------|--------|---------|-----------------|------------------------|------|---------|-----------------|-------------------------|--------|---------|-----------------|
|                            | <i>b</i>                | SE     | $\beta$ | <i>p</i>        | <i>b</i>               | SE   | $\beta$ | <i>p</i>        | <i>b</i>                | SE     | $\beta$ | <i>p</i>        |
| Constant                   | 11.51<br>(10.62, 12.44) | 0.45   |         | <i>p</i> = .001 | 10.77<br>(9.92, 11.53) | 0.41 |         | <i>p</i> = .001 | 15.42<br>(14.54, 16.32) | 0.45   |         | <i>p</i> = .001 |
| Work-privacy conflict      | -0.03<br>(-0.04, -0.02) | 0.01   | -.25    | <i>p</i> = .001 | -0.00<br>(-0.01, 0.01) | 0.01 | -.01    | <i>p</i> = .932 | -0.03<br>(-0.04, -0.01) | 0.01   | -.23    | <i>p</i> = .001 |
| <i>n</i>                   |                         | 336    |         |                 |                        | 335  |         |                 |                         | 335    |         |                 |
| <i>R</i> <sup>2</sup>      |                         | .06*** |         |                 |                        | .00  |         |                 |                         | .05*** |         |                 |
| Adj. <i>R</i> <sup>2</sup> |                         | .06*** |         |                 |                        | -.00 |         |                 |                         | .05*** |         |                 |

**Additional file 3. Continued.**

| Support in faith           |                         |      |         |                 | Alcohol and cigarette consumption |       |         |                 |
|----------------------------|-------------------------|------|---------|-----------------|-----------------------------------|-------|---------|-----------------|
| Variable                   | <i>b</i>                | SE   | $\beta$ | <i>p</i>        | <i>b</i>                          | SE    | $\beta$ | <i>p</i>        |
| Constant                   | 8.48<br>(7.32, 9.75)    | 0.58 |         | <i>p</i> = .001 | 4.68<br>(3.83, 5.45)              | 0.42  |         | <i>p</i> = .001 |
| Work-privacy conflict      | -0.02<br>(-0.03, -0.00) | 0.01 | -.11    | <i>p</i> = .075 | 0.02<br>(0.00, 0.03)              | 0.01  | .14     | <i>p</i> = .015 |
| <i>n</i>                   |                         | 335  |         |                 |                                   | 336   |         |                 |
| <i>R</i> <sup>2</sup>      |                         | .01* |         |                 |                                   | .02** |         |                 |
| Adj. <i>R</i> <sup>2</sup> |                         | .01* |         |                 |                                   | .02** |         |                 |

*Note.* All values have been rounded off to two decimal places except *p*-values. \**p* < 0.05; \*\**p* < 0.01. \*\*\**p* < 0.001. 95% bias corrected and accelerated confidence intervals reported in parentheses. Confidence intervals, *p*-values and standard errors based on 1000 bootstrap samples. Cook's distance was used to examine outliers (Positive thinking: between 0.000 and 0.049; active stress coping: between 0.000 and 0.049; social support: between 0.000 and 0.192; support in faith: between 0.000 and 0.090; alcohol and cigarette consumption: between 0.000 and 0.079). *b* = unstandardized coefficient; SE = standard error;  $\beta$  = standardized coefficient.
