# Supplementary material for: Stress perception, coping behaviors and work-privacy conflict of student midwives in times of COVID-19 pandemic: the “Healthy MidStudents” study in Germany
Source: Springer Nature journal article supplement (doi:10.1186/s12913-024-10823-5), 2024-05-07
Supplement: MOESM4 [file 27065434]

**Additional file 4.** Moderation analyses for associations between stress perception, work-privacy conflict, parental status and coping behaviors.

| Variable                                  | Positive thinking      |      |          |                 | Active stress coping    |      |          |                 | Social support          |      |          |                 |
|-------------------------------------------|------------------------|------|----------|-----------------|-------------------------|------|----------|-----------------|-------------------------|------|----------|-----------------|
|                                           | <i>b</i>               | SE   | <i>t</i> | <i>p</i>        | <i>b</i>                | SE   | <i>t</i> | <i>p</i>        | <i>b</i>                | SE   | <i>t</i> | <i>p</i>        |
| Constant                                  | 10.24<br>(9.14, 11.26) | 0.54 | 18.45    | <i>p</i> < .001 | 11.42<br>(10.39, 12.42) | 0.52 | 21.38    | <i>p</i> < .001 | 12.84<br>(11.74, 13.96) | 0.56 | 22.41    | <i>p</i> < .001 |
| Stress perception (centred)               | -1.14<br>(-2.52, 0.33) | 0.73 | -1.50    | <i>p</i> = .135 | -0.90<br>(-2.61, 0.95)  | 0.89 | -0.97    | <i>p</i> = .334 | -1.38<br>(-2.80, 0.18)  | 0.75 | -1.77    | <i>p</i> = .077 |
| Work-privacy conflict (centred)           | -0.00<br>(-0.02, 0.01) | 0.01 | -0.62    | <i>p</i> = .539 | 0.01<br>(-0.00, 0.03)   | 0.01 | 1.70     | <i>p</i> = .089 | -0.01<br>(-0.03, 0.00)  | 0.01 | -1.36    | <i>p</i> = .176 |
| Stress perception x Work-privacy conflict | 0.01<br>(-0.01, 0.03)  | 0.01 | 1.41     | <i>p</i> = .161 | 0.02<br>(-0.00, 0.03)   | 0.01 | 1.69     | <i>p</i> = .091 | -0.00<br>(-0.02, 0.02)  | 0.01 | -0.35    | <i>p</i> = .727 |
| Parenthood                                | -0.38<br>(-0.91, 0.19) | 0.29 | -1.27    | <i>p</i> = .207 | -0.44<br>(-0.97, 0.13)  | 0.28 | -1.53    | <i>p</i> = .128 | 0.53<br>(-0.06, 1.12)   | 0.30 | 1.75     | <i>p</i> = .082 |
| Stress perception x Parenthood            | -0.19<br>(-0.99, 0.58) | 0.41 | -0.46    | <i>p</i> = .648 | 0.05<br>(-0.93, 0.96)   | 0.47 | 0.10     | <i>p</i> = .919 | 0.17<br>(-0.69, 0.96)   | 0.41 | 0.40     | <i>p</i> = .690 |
| <i>n</i>                                  | 330                    |      |          |                 | 330                     |      |          |                 | 330                     |      |          |                 |
| <i>R</i> <sup>2</sup>                     | .23***                 |      |          |                 | .07**                   |      |          |                 | .15***                  |      |          |                 |

**Additional file 4. Continued.**

| Support in faith                          |                        |       |          |                 | Alcohol and cigarette consumption |      |          |                 |
|-------------------------------------------|------------------------|-------|----------|-----------------|-----------------------------------|------|----------|-----------------|
| Variable                                  | <i>b</i>               | SE    | <i>t</i> | <i>p</i>        | <i>b</i>                          | SE   | <i>t</i> | <i>p</i>        |
| Constant                                  | 7.78<br>(6.25, 9.31)   | 0.77  | 9.85     | <i>p</i> < .001 | 5.66<br>(4.10, 7.40)              | 0.84 | 6.68     | <i>p</i> < .001 |
| Stress perception (centred)               | 1.47<br>(-0.88, 3.70)  | 1.15  | 1.24     | <i>p</i> = .215 | 0.04<br>(-2.16, 2.48)             | 1.18 | 0.03     | <i>p</i> = .974 |
| Work-privacy conflict (centred)           | -0.01<br>(-0.03, 0.01) | 0.001 | -1.00    | <i>p</i> = .317 | 0.01<br>(-0.00, 0.03)             | 0.01 | 1.74     | <i>p</i> = .083 |
| Stress perception x Work-privacy conflict | 0.00<br>(-0.02, 0.03)  | 0.01  | 0.15     | <i>p</i> = .882 | 0.02<br>(0.00, 0.04)              | 0.01 | 2.13     | <i>p</i> = .034 |
| Parenthood                                | -0.17<br>(-0.98, 0.65) | 0.41  | -0.40    | <i>p</i> = .690 | 0.01<br>(-0.89, 0.82)             | 0.44 | 0.01     | <i>p</i> = .989 |
| Stress perception x Parenthood            | -1.03<br>(-2.17, 0.18) | 0.60  | -1.66    | <i>p</i> = .098 | 0.17<br>(-1.10, 1.31)             | 0.62 | 0.27     | <i>p</i> = .787 |
| <i>n</i>                                  |                        | 330   |          |                 |                                   | 330  |          |                 |
| <i>R</i> <sup>2</sup>                     |                        | .03*  |          |                 |                                   | .04* |          |                 |

*Note.* All values have been rounded off to two decimal places except  $p$ -values. \* $p < 0.05$ ; \*\* $p < 0.01$ . \*\*\* $p < 0.001$ . 95% bootstrap confidence intervals reported in parentheses. Confidence intervals and standard errors based on 5000 bootstrap samples. Cook's distance was used to examine outliers (Positive thinking: between 0.000 and 0.098; active stress coping: between 0.000 and 0.061; social support: between 0.000 and 0.118; support in faith: between 0.000 and 0.048; alcohol and cigarette consumption: between 0.000 and 0.255).  $b$  = unstandardized coefficient; SE = standard error.
