# Supplementary material for: Stress perception, coping behaviors and work-privacy conflict of student midwives in times of COVID-19 pandemic: the “Healthy MidStudents” study in Germany
Source: Springer Nature journal article supplement (doi:10.1186/s12913-024-10823-5), 2024-05-07
Supplement: MOESM5 [file 27065434]

**Additional file 5.** Moderation analyses for associations between stress perception, perception of impact of COVID-19 pandemic on studies and coping behaviors.

|                                                                      | Positive thinking       |      |          |                 | Active stress coping    |      |          |                 | Social support          |      |          |                 |
|----------------------------------------------------------------------|-------------------------|------|----------|-----------------|-------------------------|------|----------|-----------------|-------------------------|------|----------|-----------------|
| Variable                                                             | <i>b</i>                | SE   | <i>t</i> | <i>p</i>        | <i>b</i>                | SE   | <i>t</i> | <i>p</i>        | <i>b</i>                | SE   | <i>t</i> | <i>p</i>        |
| Constant                                                             | 9.61<br>(9.38, 9.82)    | 0.11 | 86.73    | <i>p</i> < .001 | 10.71<br>(10.48, 10.92) | 0.11 | 94.41    | <i>p</i> < .001 | 13.80<br>(13.58, 14.03) | 0.11 | 121.16   | <i>p</i> < .001 |
| Stress perception (centred)                                          | -1.55<br>(-1.88, -1.20) | 0.17 | -8.56    | <i>p</i> < .001 | -0.54<br>(-0.95, -0.14) | 0.21 | -2.56    | <i>p</i> = .011 | -1.40<br>(-1.79, -0.98) | 0.21 | -6.81    | <i>p</i> < .001 |
| Perceived impact of COVID-19 pandemic on studies (centred)           | 0.27<br>(0.02, 0.53)    | 0.13 | 1.98     | <i>p</i> = .048 | 0.01<br>(-0.23, 0.24)   | 0.12 | 0.10     | <i>p</i> = .952 | -0.18<br>(-0.42, 0.10)  | 0.13 | -1.36    | <i>p</i> = .176 |
| Stress perception x perceived impact of COVID-19 pandemic on studies | 0.09<br>(-0.38, 0.53)   | 0.24 | 0.34     | <i>p</i> = .735 | 0.02<br>(-0.38, 0.41)   | 0.20 | 0.10     | <i>p</i> = .920 | 0.18<br>(-0.19, 0.60)   | 0.20 | 0.89     | <i>p</i> = .375 |
| <i>n</i>                                                             | 305                     |      |          |                 | 305                     |      |          |                 | 305                     |      |          |                 |
| <i>R</i> <sup>2</sup>                                                | .22***                  |      |          |                 | .03                     |      |          |                 | .18***                  |      |          |                 |

**Additional file 5. Continued.**

|                                                                      | Support in faith        |      |          |                 | Alcohol and cigarette consumption |      |          |                 |
|----------------------------------------------------------------------|-------------------------|------|----------|-----------------|-----------------------------------|------|----------|-----------------|
| Variable                                                             | <i>b</i>                | SE   | <i>t</i> | <i>p</i>        | <i>b</i>                          | SE   | <i>t</i> | <i>p</i>        |
| Constant                                                             | 7.42<br>(7.14, 7.71)    | 0.15 | 48.99    | <i>p</i> < .001 | 5.80<br>(5.54, 6.07)              | 0.13 | 42.80    | <i>p</i> < .001 |
| Stress perception (centred)                                          | -0.47<br>(-0.92, -0.06) | 0.22 | -2.18    | <i>p</i> = .030 | 0.47<br>(0.06, 0.91)              | 0.21 | 2.16     | <i>p</i> = .031 |
| Perceived impact of COVID-19 pandemic on studies (centred)           | 0.20<br>(-0.16, 0.53)   | 0.18 | 1.12     | <i>p</i> = .262 | -0.14<br>(-0.49, 0.21)            | 0.17 | -0.75    | <i>p</i> = .455 |
| Stress perception x perceived impact of COVID-19 pandemic on studies | 0.12<br>(-0.40, 0.59)   | 0.25 | 0.45     | <i>p</i> = .654 | -0.01<br>(-0.57, 0.61)            | 0.30 | -0.05    | <i>p</i> = .963 |
| <i>n</i>                                                             | 305                     |      |          |                 | 305                               |      |          |                 |
| <i>R</i> <sup>2</sup>                                                | .02                     |      |          |                 | .02                               |      |          |                 |

*Note.* All values have been rounded off to two decimal places except *p*-values. \**p* < 0.05; \*\**p* < 0.01. \*\*\**p* < 0.001. 95% bootstrap confidence intervals reported in parentheses. Confidence intervals and standard errors based on 5000 bootstrap samples. Cook's distance was used to examine outliers (Positive thinking: between 0.000 and 0.098; active stress coping: between 0.000 and 0.061; social support: between 0.000 and 0.118; support in faith: between 0.000 and 0.048; alcohol and cigarette consumption: between 0.000 and 0.255). *b* = unstandardized coefficient; SE = standard error.
